# Supplementary material for: Views and experiences of nurse practitioners and medical practitioners with collaborative practice in primary health care – an integrative review
Source: BMC Fam Pract. 2013 Sep 5;14:132. doi: 10.1186/1471-2296-14-132 (PMC3846155; doi:10.1186/1471-2296-14-132)
Supplement: Additional file 2 — Evidence table, Table that provides details of all included studies. [file 1471-2296-14-132-S2.pdf]

## Evidence table

| Reference                  | Aim                                                                                                                                                                                             | Methodologies/<br>Design                                                                                                                     | Population,<br>sample size,<br>sampling                          | Context/ Setting                                                                                     | Theoretical frameworks/<br>data collection methods                                                                   | Outcomes                                                                                                                                                                                                                                                                                                                                                                                                                                                                                                                                                                                                                                                                                                                                                                | Strengths and limitations                                                                                                                                                                                                                                                                                                          |
|----------------------------|-------------------------------------------------------------------------------------------------------------------------------------------------------------------------------------------------|----------------------------------------------------------------------------------------------------------------------------------------------|------------------------------------------------------------------|------------------------------------------------------------------------------------------------------|----------------------------------------------------------------------------------------------------------------------|-------------------------------------------------------------------------------------------------------------------------------------------------------------------------------------------------------------------------------------------------------------------------------------------------------------------------------------------------------------------------------------------------------------------------------------------------------------------------------------------------------------------------------------------------------------------------------------------------------------------------------------------------------------------------------------------------------------------------------------------------------------------------|------------------------------------------------------------------------------------------------------------------------------------------------------------------------------------------------------------------------------------------------------------------------------------------------------------------------------------|
| <b>Qualitative studies</b> |                                                                                                                                                                                                 |                                                                                                                                              |                                                                  |                                                                                                      |                                                                                                                      |                                                                                                                                                                                                                                                                                                                                                                                                                                                                                                                                                                                                                                                                                                                                                                         |                                                                                                                                                                                                                                                                                                                                    |
| [61]                       | To explore and define the meaning of collaborative practice as experienced by the NP and MP.                                                                                                    | Exploratory and descriptive qualitative study (Grounded Theory)                                                                              | 3 NP-MP dyads in private practice<br><br>Purposeful sampling     | GP practices, South-Eastern US                                                                       | - Semi-structured individual interviews<br>- Interviews with each NP-MP dyad<br>- Observations<br>- Content analysis | - Developed themes (frequency in data): Personality, Competence, Communication, Autonomy, coordination, Trust, Benefits of collaboration, Barriers<br>- Barriers: Economical, traditional hierarchy, lack of collegial support, lack of autonomy, knowledge deficit, lack of shared responsibility<br>- Some examples of successful collaboration                                                                                                                                                                                                                                                                                                                                                                                                                       | Limitations: Small sample size; author claims to use grounded theory for data analysis but applies summative content analysis throughout; researcher influence on data not discussed; author states that observations were undertaken but these data do not occur in the data analysis or results; no statement on ethics approval |
| [60]                       | To understand the experiences of NPs and MPs working in collaborative practice and to examine the impact of an educational intervention on interprofessional practice (comparison of practices) | Exploratory qualitative study, using narrative analysis, a form of interpretive analysis<br><br>Part of a larger mixed methods study [19,59] | 5 NPs and 13 family MPs<br><br>Purposeful sampling               | 4 rural primary care practices, Ontario, Canada                                                      | - Interviews (based on 'Collaboration and Satisfaction About Care Decisions' instrument                              | - Themes: NPs' scope of practice and NP competence with an emphasis on role clarity and trust; issues around control at the work place; ideological differences regarding disease prevention and health promotion, differences in perceptions about the operation of collaborative practice and understanding that collaborative relationships evolve.<br>- MPs participating in intervention to enhance collaboration indicated afterwards that they still 'rarely' consulted with NPs in their clinic.<br>- The theoretical ideal of collaboration has not been achieved in practice<br>- NP services were underutilized<br>- Referral practices were not reciprocal.<br>- Facilitators: length of time together, proximity to one another, past positive experiences | Strengths: Well described data analysis method; credible representation of participants<br><br>Limitations: Data from 2000; limited generalisability; researcher influence on data not stated                                                                                                                                      |
| [72]                       | To explore the current role of advanced NPs in PHC, and how NPs within three different nursing disciplines in PHC developed their roles                                                         | Exploratory qualitative study                                                                                                                | 18 advanced NPs (11 practice managers)<br><br>Purposive sampling | PHC practices and community centres; West Midlands, UK                                               | - Semi-structured interviews<br>- Content analysis and thematic analysis                                             | - Barriers: NPs felt not supported by MPs, power struggle for NPs as 'handmaiden', lack of understanding of NP role by MPs; limited NP autonomy in regards to prescriptions increases MP workload.<br>- Facilitators: NPs felt supported by MPs, MPs consulted the NPs if they were confident about the NPs' competence.                                                                                                                                                                                                                                                                                                                                                                                                                                                | Strengths: Large sample size; well presented and credible results<br><br>Limitations: Researcher influence on data not stated; research philosophy not stated                                                                                                                                                                      |
| [73]                       | To explore the value of NPs and to describe their role in PHC                                                                                                                                   | Mixed-methods long-term study (4 years)<br><br>This paper reports qualitative results                                                        | 7 NPs<br>7 GPs (= 7 groups)<br><br>Convenience sample            | PHC practices, Netherlands                                                                           | - 29 interviews<br>- observations from consultations (quant data)<br>- job satisfaction questionnaire                | - 5/7 MPs considered NP's communication skills as good.<br>- 4/7 NPs were very satisfied with MP supervision.<br>- 6/6 MPs were very satisfied with the NP as PHC professional<br>- NPs and MPs share care of patients with complex needs<br>- MPs are mentors for NPs<br>- Role clarity is important<br>- MP noted that NP consultations differ to their own                                                                                                                                                                                                                                                                                                                                                                                                           | Strengths: Participant voices are well presented<br><br>Limitations: Authors lack to link qualitative findings to results from other methods; researcher influence on data not stated; research philosophy not stated; description of data analysis lacks detail                                                                   |
| [70]                       | To explore and describe nurse practitioners' experiences and perceptions of interprofessional collaboration with MPs in PHC                                                                     | Naturalist inquiry<br><br>Qualitative descriptive study design                                                                               | 6 NPs<br><br>Purposive and snowball sampling                     | 1 Family Health Team, 1 PHC Network, 2 Community clinics, 1 Community Health Centre; Ontario, Canada | - semi-structured interviews,<br>- content analysis                                                                  | Seven themes:<br>- quality of communication,<br>- complementary vision,<br>- physician remuneration methods,<br>- establishing and maintaining relationships,<br>- investing time and energy,<br>- nurse practitioner competency and expertise<br>- mutual trust and respect                                                                                                                                                                                                                                                                                                                                                                                                                                                                                            | Strengths: Well described study, participant voices are well presented, findings are credible<br><br>Limitations: Researcher background stated but influence on data not discussed                                                                                                                                                 |
| [57]                       | To examine the                                                                                                                                                                                  | Qualitative                                                                                                                                  | 10 MPs                                                           | Family practice,                                                                                     | Semi-structured                                                                                                      | - MPs concerned about independent NP practice.                                                                                                                                                                                                                                                                                                                                                                                                                                                                                                                                                                                                                                                                                                                          | Limitations: Lack of participant citations                                                                                                                                                                                                                                                                                         |

|      |                                                                                                                                                                                                          |                                                          |                                                                                                                                                            |                                                  |                                                                                                           |                                                                                                                                                                                                                                                                                                                                                                                                                                                                                                                                                 |                                                                                                                                                                                                                                                             |
|------|----------------------------------------------------------------------------------------------------------------------------------------------------------------------------------------------------------|----------------------------------------------------------|------------------------------------------------------------------------------------------------------------------------------------------------------------|--------------------------------------------------|-----------------------------------------------------------------------------------------------------------|-------------------------------------------------------------------------------------------------------------------------------------------------------------------------------------------------------------------------------------------------------------------------------------------------------------------------------------------------------------------------------------------------------------------------------------------------------------------------------------------------------------------------------------------------|-------------------------------------------------------------------------------------------------------------------------------------------------------------------------------------------------------------------------------------------------------------|
|      | perceptions of family MPs toward NPs and physician assistants                                                                                                                                            | study                                                    | (residents)<br><br>Convenience sample of MPs with random selection of participants                                                                         | Southeast US                                     | interviews                                                                                                | <ul style="list-style-type: none"> <li>- MPs made positive comments about NPs, but the approval was generally based on the NP's adherence to guidelines</li> <li>- MPs feel more comfortable with NPs in traditional roles.</li> <li>- MPs misinformation about NP role and qualification.</li> <li>- Diagnostic skills of NPs are limited (perceived by MPs)</li> <li>- NPs can alleviate MPs workload</li> <li>- NPs are cost-effective</li> <li>- Positive attitude towards NPs from MPs who had experience in working with them.</li> </ul> | to illustrate findings, researcher influence on data not stated; research philosophy not stated<br><br>EXCLUDED FOR ANALYSIS                                                                                                                                |
| [17] | To examine the phenomenon of MP valuing of NPs in rural PHC clinics                                                                                                                                      | Naturalist Inquiry<br><br>Descriptive exploratory design | 10 MPs<br><br>Convenience sampling                                                                                                                         | Rural PHC clinics, Central/southern Missouri, US | Semi-structured interviews                                                                                | 3 overarching themes: NPs value to the MP, to the practice, to the patient<br><ul style="list-style-type: none"> <li>- Differing perceptions of NPs and MPs about collaboration</li> <li>- Lack of reciprocity</li> <li>- MPs conceptualisation of collaboration is not conform to the ideal described in literature.</li> </ul>                                                                                                                                                                                                                | Strengths: participant voices are well presented, findings are credible, researcher background and influence on data stated<br><br>Limitations: Short interviews (10-30 min) may lack in-depths data, not very well written                                 |
| [79] | To elicit data about MPs' knowledge and ideas about working with NPs                                                                                                                                     | Qualitative study                                        | 8 resident MPs, 3 faculty MPs<br><br>Convenience sampling                                                                                                  | Family Medicine Residency; Manitoba, Canada      | 3 focus group discussions                                                                                 | <ul style="list-style-type: none"> <li>- Concern voiced by MPs towards collaboration</li> <li>- Advantages seen by MPs to work in collaboration</li> <li>- Barriers: NP education not equivalent to MP education, so NPs is not seen as equal partners; lack of understanding of skills of a NP</li> </ul>                                                                                                                                                                                                                                      | Strengths: researcher background stated<br><br>Limitations: Poor reporting, research philosophy not stated, description of data analysis lacks detail                                                                                                       |
| [69] | To investigate and describe the experiences of advanced practice nurses (APN) and of their supervising MP, regarding the role and scope of practice                                                      | Qualitative study based in Anthropology                  | 4 APNs (similar to NPs), 5 MPs<br><br>Purposeful sampling                                                                                                  | PHC centres, Sweden                              | <ul style="list-style-type: none"> <li>- Interviews with APNs</li> <li>- Focus groups with MPs</li> </ul> | Four themes were developed: Confidence and trust, the positioning of old and new roles (establishing role clarity), demarcation, expectations and experience of the NP as a resource                                                                                                                                                                                                                                                                                                                                                            | Strengths: participants well represented, findings credible<br><br>Limitations: researcher background and influence on data not stated                                                                                                                      |
| [63] | To investigate how the working patterns of PHC teams have been altered as a result of the introduction of NPs, the ways in which NPs' skills are integrated into the team and perceptions of the NP role | Qualitative study                                        | Interviewed:<br>4 NPs<br>3 GPs<br>Focus groups:<br>3 GPs, 3 NPs<br>6 practice nurses,<br>3 practice managers<br>3 receptionists<br><br>Purposeful sampling | PHC practices, Northern Ireland                  | <ul style="list-style-type: none"> <li>- Focus groups</li> <li>- semi-structured interviews</li> </ul>    | <ul style="list-style-type: none"> <li>- Barriers: MPs have more time for complex cases (which by some has been experienced as stressful and some were concerned about becoming de-skilled in some areas), lack of understanding of the NP role, lack of clarity about legal situation for NPs</li> <li>- Facilitators: Respect from colleagues, support from MPs who had previously known the NPs, knowing your own limitations (perceived by NPs), official recognition of the NP role</li> </ul>                                             | Strengths: participants well represented, findings credible<br><br>Limitations: research philosophy and researcher background not stated                                                                                                                    |
| [64] | To explore, how health professionals perceive the role of NPs in PHC                                                                                                                                     | Qualitative study, (Grounded theory)                     | 10 GPs,<br>8 NPs,<br>1 practice nurse<br>2 managers<br><br>Purposeful sampling                                                                             | 5 PHC Centres; Southampton City, UK              | Semi-structured interviews                                                                                | Barriers to NP role: organisational factors, training and prescribing issues, lack of a professional register, and cultural issues including tensions, boundaries and responsibility.                                                                                                                                                                                                                                                                                                                                                           | Strengths: participant voices are well presented, findings are credible<br><br>Limitations: Authors claims to use grounded theory but no theory has been developed, rather descriptive presentation of findings; researcher influence on data not discussed |
| [65] | To obtain the views of members of the PHC team about the NP role and to explore how this was perceived to                                                                                                | Qualitative study                                        | 9 GPs (other staff, total of 27)<br><br>Convenience sampling                                                                                               | 4 GP practice, North-West England                | Semi-structured interviews in groups and with individuals                                                 | <ul style="list-style-type: none"> <li>- MPs unclear about NP role</li> <li>- MPs experienced release of consultation time</li> <li>- MPs concerned about ultimate responsibility</li> <li>- MPs ambivalent about cost effectiveness of NP</li> </ul>                                                                                                                                                                                                                                                                                           | Strengths: participant voices are well presented, findings are credible<br><br>Limitations: Data from 2000, research philosophy, researcher background and influence on data not stated                                                                     |

|                        |                                                                                                                                     |                                        |                                                                                                                                            |                                             |                                                                                                                                                                                             |                                                                                                                                                                                                                                                                                                                                                                                                                                                                                                                |                                                                                                                                                                                                                                                                           |
|------------------------|-------------------------------------------------------------------------------------------------------------------------------------|----------------------------------------|--------------------------------------------------------------------------------------------------------------------------------------------|---------------------------------------------|---------------------------------------------------------------------------------------------------------------------------------------------------------------------------------------------|----------------------------------------------------------------------------------------------------------------------------------------------------------------------------------------------------------------------------------------------------------------------------------------------------------------------------------------------------------------------------------------------------------------------------------------------------------------------------------------------------------------|---------------------------------------------------------------------------------------------------------------------------------------------------------------------------------------------------------------------------------------------------------------------------|
|                        | impact on them, the practice and patient care.                                                                                      |                                        | (practices), Purposive sampling (staff)                                                                                                    |                                             |                                                                                                                                                                                             |                                                                                                                                                                                                                                                                                                                                                                                                                                                                                                                |                                                                                                                                                                                                                                                                           |
| [67]                   | To explore the role and practice of NPs in general practice.                                                                        | Qualitative study                      | 4 NPs<br>4 GPs<br>(4 receptionists, 24 patients)<br><br>Convenience/snowball sampling (practices), Purposive sampling (staff)              | 4 general practices; South-East England     | Semi-structured in depths interviews                                                                                                                                                        | - Barriers: MPs concerned about legal responsibility<br>- Facilitators: support from MPs, higher level of NP autonomy<br>- Reduction of MP workload through NP<br>- MP defines work that is delegated to the NP                                                                                                                                                                                                                                                                                                | Strengths: participant voices are well presented, findings are credible<br><br>Limitations: Ethics approval not reported, Research philosophy not reported, Data analysis method unclear, researcher background and influence on data not stated.                         |
| [66]                   | To explore views of GPs regarding their attitudes towards NP role                                                                   | Qualitative study                      | 25 GPs<br><br>Purposeful sampling                                                                                                          | 4 GP practices, Yorkshire, UK               | Focus groups                                                                                                                                                                                | - Themes: NPs concerned about their status including job and financial security, about nursing capabilities including training and scope of responsibility, and about structural and organisational barriers                                                                                                                                                                                                                                                                                                   | Strengths: Participants well presented, results are credible, large sample size suggests generalisability to similar setting.<br><br>Limitations: Ethics approval not reported, research philosophy not reported, researcher background and influence on data not stated. |
| <b>Survey studies</b>  |                                                                                                                                     |                                        |                                                                                                                                            |                                             |                                                                                                                                                                                             |                                                                                                                                                                                                                                                                                                                                                                                                                                                                                                                |                                                                                                                                                                                                                                                                           |
| [14]                   | To test a theoretical model linking NP's perceptions of workplace empowerment, collaboration with MPs and managers, and job strain. | Mailed survey                          | 54 PHC NPs (and 63 acute care NPs, not included in this review)<br><br>Convenience sample of registered nurses who indicated working as NP | Ontario, Canada                             | - Kanter's structural theory of power in organizations<br>- Survey including 'Conditions of work effectiveness questionnaire', 'Collaborative behaviour scale', 'Job content questionnaire' | - NP workplace empowerment positively related to collaboration with MPs ( $r=.442$ , $p=.0001$ )<br>- NP's perceptions of job strain negatively related to collaboration with MPs ( $r=-.362$ , $p=.004$ )                                                                                                                                                                                                                                                                                                     | Strengths: Validated tools<br>Good response rate<br><br>Limitations: Limited generalisability due to convenience sample.                                                                                                                                                  |
| [77]                   | To evaluate factors associated with MPs' attitudes toward NPs providing PHC.                                                        | Mailed survey                          | 259 PHC MPs<br><br>Random selection of PHC MPs of list with all MPs in Iowa                                                                | non-institutional-based PHC sites; Iowa, US | Survey (11-item questionnaire with 5 point Likert scale)                                                                                                                                    | - MPs had more favourable attitudes towards NPs when they had previous experience working with NPs providing PHC ( $P=.01$ )<br>- MPs were more likely to have had experience with an NP providing PHC if they were in pediatrics or obstetrics-gynecology (78.3% and 70.0%, respectively; $P<.001$ ), had been in practice for fewer than 20 years ( $P=.045$ ), or were in practices with 5 or more MPs.<br>- Age, sex, years in practice, and practice size, were not significantly related to MP attitude. | Strengths: Validated tool; Random sampling<br><br>Limitations: Low response rate (42%); Data from 1994                                                                                                                                                                    |
| Bergeson et al. 1997 * | To assess MPs' awareness of and attitudes toward the use of physician assistants and NPs                                            | Mailed survey and follow-up interviews | 277 family MPs<br><br>Convenience sampling                                                                                                 | Non-urban towns in Minnesota, US            | Self-developed mixed methods questionnaire with Likert-Scales and free text fields. Telephone interviews with 22 MPs                                                                        | - 66.2% of MPs who had previously worked with NPs indicated their experience as positive, 21.5% as somewhat positive, 7.3% as neutral, 4.6% as somewhat negative and 0.5% as negative.<br>- (other results were not reported separately for NPs and physician assistants)                                                                                                                                                                                                                                      | Strengths: Data validation through follow-up interviews<br><br>Limitations: Low response rate (46.2%); no psychometric properties reported for questionnaire, data analysis process of qualitative interview data unclear                                                 |
| [76]                   | To investigate GP's perceptions of the NP role                                                                                      | Mailed survey                          | 225 GPs                                                                                                                                    | Lincolnshire and Sheffield, UK              | - Self developed questionnaire with open and closed questions<br>- descriptive and inferential statistics<br>- content analysis                                                             | - More acceptance of NPs by MPs who employ NP<br>- Different opinions between MPs who employ and who do not employ NPs<br>- Reason to employ NPs: increased patient choice, reduced workload, more cost effective use of resources, MP shortage, reduced waiting times.                                                                                                                                                                                                                                        | Strengths: Large sample size<br><br>Limitations: Low response rate (33%); no psychometric properties of questionnaire reported; correlational analysis not undertaken for all results; findings from                                                                      |

|      |                                                                                                                                                                                                                                                   |                                                                                                        |                                                                                |                                                                                 |                                                                                                                                                                                                             |                                                                                                                                                                                                                                                                                                                                                                                                                                                                                                                                                                                                                                                                                                                                                                                                                                           |                                                                                                                                                                                                                                                            |
|------|---------------------------------------------------------------------------------------------------------------------------------------------------------------------------------------------------------------------------------------------------|--------------------------------------------------------------------------------------------------------|--------------------------------------------------------------------------------|---------------------------------------------------------------------------------|-------------------------------------------------------------------------------------------------------------------------------------------------------------------------------------------------------------|-------------------------------------------------------------------------------------------------------------------------------------------------------------------------------------------------------------------------------------------------------------------------------------------------------------------------------------------------------------------------------------------------------------------------------------------------------------------------------------------------------------------------------------------------------------------------------------------------------------------------------------------------------------------------------------------------------------------------------------------------------------------------------------------------------------------------------------------|------------------------------------------------------------------------------------------------------------------------------------------------------------------------------------------------------------------------------------------------------------|
|      |                                                                                                                                                                                                                                                   |                                                                                                        |                                                                                |                                                                                 |                                                                                                                                                                                                             |                                                                                                                                                                                                                                                                                                                                                                                                                                                                                                                                                                                                                                                                                                                                                                                                                                           | qualitative data not presented                                                                                                                                                                                                                             |
| [13] | To identify the barriers and facilitators associated with the implementation of the NP role and the NPs' job satisfaction                                                                                                                         | Mailed survey                                                                                          | 28 NPs<br><br>Convenience sampling                                             | Public Health Units;<br>Ontario, Canada                                         | Questionnaire with 6-point Likert scale based on questionnaire used in a previous study (included the ranking of barriers/facilitators)                                                                     | <ul style="list-style-type: none"> <li>- Facilitators: trust shown by the MP in making shared decisions, respect shown by the MP, personality and philosophy of the MPs</li> <li>- Barriers: most frequent: unwillingness of specialists to accept referrals from the NP, MP lack of understanding of the NP role, personality and philosophy of the MPs</li> <li>- NPs generally "satisfied" with collaborative relationship with the MP</li> <li>- NP work satisfaction positively correlated with satisfaction with their collaborative relationship with the MP (<math>r = 0.59</math>, <math>p &lt; 0.01</math>).</li> <li>- NP work satisfaction negatively correlated with the number of barriers present in their relationships with the MP (<math>r = -0.46</math>, <math>p &lt; 0.05</math>).</li> </ul>                        | <p>Strengths: Very high response rate (95%), generalisable within NP population</p> <p>Limitations: Sample size too small to detect significant differences; no psychometric properties of questionnaire reported</p>                                      |
| [68] | To describe NPs' and MDs' perceptions of the role of NPs, the degree of collegiality between professions, and NPs' feeling of acceptance.                                                                                                         | Mailed survey<br><br>Part of a mixed methods survey [75]. This paper focuses on 4 open-ended questions | 74 NPs,<br>79 MPs<br><br>Convenience sampling                                  | 7 Veterans affairs outpatient clinics;<br>Michigan, Indiana, Illinois, Ohio, US | Closed- and open-ended questions plus several Likert-type questions                                                                                                                                         | <p>Three themes identified: Roles of the NP in PHC, workload reduction of MPs, clinical competence or independence of NPs.</p> <p>Results from quantitative data report attitudes of NPs and MPs towards collaboration</p>                                                                                                                                                                                                                                                                                                                                                                                                                                                                                                                                                                                                                | <p>Strengths: Good overall response rate (61.4%), data validation through mixed-methods questionnaire</p> <p>Limitations: Participant selection process unclear, low response rate for MPs (49%), no psychometric properties of questionnaire reported</p> |
| [75] | To examine the perceptions of NPs and MPs regarding NPs' roles as PHC providers                                                                                                                                                                   | Mailed survey<br><br>Part of a mixed methods survey [68]. This paper reports quantitative data         | 74 NPs,<br>79 MPs<br><br>Convenience sampling                                  | 7 Veterans affairs outpatient clinics;<br>Michigan, Indiana, Illinois, Ohio, US | Closed- and open-ended questions plus several Likert-type questions                                                                                                                                         | <ul style="list-style-type: none"> <li>- NPs and MPs agreed on NP independence of care for chronic patients, but not for acute patients.</li> <li>- NPs were significantly more likely than MPs to indicate they independently conducted assessments, planned care, added or changed medications, and performed other unspecified activities for acute patients (<math>p &lt; 0.01</math>)</li> <li>- NPs were more likely to care for patients with less comorbidity while MPs cared for patient with more comorbidity.</li> </ul>                                                                                                                                                                                                                                                                                                       | <p>Strengths: Good overall response rate (61.4%), Confounding factors included in analysis</p> <p>Limitations: Data from 2004, low response rate for MPs (49%), no psychometric properties of questionnaire reported</p>                                   |
| [71] | To explore the attitudes and beliefs of pediatric NPs and pediatricians concerning collaborative practice relationships; and to explore the themes that emerged to establish a definition of collaborative practice between NPs and pediatricians | Mailed survey                                                                                          | 24 pediatric NP and pediatrician dyads<br><br>Random sampling from list of NPs | Paediatric PHC practices<br>US                                                  | <ul style="list-style-type: none"> <li>- Mixed methods questionnaire with open ended questions and Likert scale rating</li> <li>- Collazzi's phenomenological methodology used for data analysis</li> </ul> | <ul style="list-style-type: none"> <li>- Definition of collaboration: (4 themes): Working together/collegial relationship, consultation, share philosophy/goals, complimentary practice styles/comfort level</li> <li>- Facilitators: Trust and mutual respect, communication, shared practice, competence (from NP data), similar vision (from MP data)</li> <li>- Barriers: Lack of respect, territorial/control issues, undesirable attitude/behavior of MPs, lack of competence (from NP data); Control/inflexible, NP competence in clinical practice, ineffective communication (from MP data)</li> <li>- Differing understandings of supervision and independence</li> <li>- Trust, clinical competence, knowing when to seek consultation were rated high as important characteristics of collaboration by NPs and MPs</li> </ul> | <p>Strengths: Random selection of participants, rigorous analysis method, data validation through mixed-methods questionnaire</p> <p>Limitations: Low response rate (17.3%); not all themes are supported with quotes.</p>                                 |
| [74] | To identify the perceptions of NPs, MPs, pharmacists and nurses towards safety climate, communication and collaboration in PHC.                                                                                                                   | Survey                                                                                                 | 12 NPs,<br>39 MPs<br>(46 nurses, 10 pharmacists)<br><br>Convenience sample     | 4 military ambulatory care clinics;<br>Midwestern US                            | Safety Attitudes Questionnaire (77 items), Likert-scales; adapted from the 'Flight Management Attitudes Questionnaire'                                                                                      | <ul style="list-style-type: none"> <li>- 90.9% of NPs rated MPs as high/very high on collaboration or communication</li> <li>- 82.8% of MPs rated NPs as high/very high on collaboration or communication</li> </ul>                                                                                                                                                                                                                                                                                                                                                                                                                                                                                                                                                                                                                      | <p>Strengths: Validated tool, good response rate (65%)</p> <p>Limitations: Sample size too small to detect significant differences</p>                                                                                                                     |

|                              |                                                                                                                                                                                    |                                                                                                |                                                                               |                                                                        |                                                                                                                                                                      |                                                                                                                                                                                                                                                                                                                                                                                                                                                                                                                                                                                                |                                                                                                                                                                                                                                        |
|------------------------------|------------------------------------------------------------------------------------------------------------------------------------------------------------------------------------|------------------------------------------------------------------------------------------------|-------------------------------------------------------------------------------|------------------------------------------------------------------------|----------------------------------------------------------------------------------------------------------------------------------------------------------------------|------------------------------------------------------------------------------------------------------------------------------------------------------------------------------------------------------------------------------------------------------------------------------------------------------------------------------------------------------------------------------------------------------------------------------------------------------------------------------------------------------------------------------------------------------------------------------------------------|----------------------------------------------------------------------------------------------------------------------------------------------------------------------------------------------------------------------------------------|
| [62]                         | To compare perceptions of NPs and MPs about NP role                                                                                                                                | Mailed survey                                                                                  | 28 family NPs, 37 family MPs<br><br>Random sampling from list of participants | Air Force installations, US                                            | Self-developed questionnaire with Likert scales to rank the appropriateness of tasks for NPs; and questions for perceived barriers to NP deployment                  | - NPs perceived that they could independently treat 66% of 65 symptom/illness categories. The MPs perceived that NPs could only treat 29% of those categories.<br>- Differences between NPs and MPs in a number of disease/illness areas for which NPs would need MP supervision.<br>- 38% of MPs thought that NPs require supervision of an MP                                                                                                                                                                                                                                                | Strengths: Good response rate (81%), validated tool, random sampling, results likely to be generalisable<br><br>Limitations: Randomisation process not clearly described                                                               |
| [81]                         | To explore perceptions of GPs in regarding the NP role, identifying their knowledge of and perceived problems with that role, and their experience of nurses in advanced practice. | Mailed survey                                                                                  | 50 GPs<br><br>Convenience sampling                                            | GPs in Northland District, New Zealand                                 | Questionnaire, 5-point Likert scales, adapted from the 'Survey of General Practice Physicians' Opinion Concerning the Family Nurse Practitioner'                     | - 64% of MPs said they would be willing to employ an NP; and 86% indicated a willingness to work in collaboration with an NP<br>- MPs reluctant to NP authority for prescribing, ordering tests and undertaking physical assessment.<br>- Uncertainty about NP role and competence                                                                                                                                                                                                                                                                                                             | Strengths: Results are well presented<br><br>Limitations: Limited generalizability due to low response rate (46.3%) and convenience sampling, no psychometric properties reported                                                      |
| [80]                         | To understand the acceptability for a model of chronic disease management, in which PHC patients see NPs for structured visits                                                     | Mailed survey                                                                                  | 95 NPs, 77 MPs<br><br>Random sampling                                         | Metropolitan PHC practices, Philadelphia, Pennsylvania, US             | Self-developed questionnaire with 4 point Likert scales                                                                                                              | - Most MPs and NPs believed that the proposed model of care would improve the control of chronic illnesses.<br>- The logistic regression modeling revealed that NPs were 4.2 times more likely to support the model of care than were MPs ( $P \leq .001$ ; confidence interval [CI], 2.1-8.3).                                                                                                                                                                                                                                                                                                | Strengths: random sampling, validated outcome measure, potential confounders considered<br><br>Limitations: Results may not be generalisable due to low response rate (53%)                                                            |
| [78]                         | To analyse how MP characteristics and close working relationships influence MPs' attitudes toward NPs                                                                              | Online and mailed survey                                                                       | 463 MPs<br><br>Convenience sampling                                           | Mississippi, US                                                        | Questionnaire developed by Aquilino et al. [85] with Likert scales (part of omnibus survey)                                                                          | - GPs, MPs in public sector and MPs in larger practices are more likely to work in practices that also include NPs<br>- MPs working with NPs are somewhat younger than those who do not.<br>- MPs who practice alongside NPs and who have been in practice longer have the most positive attitudes toward NPs.<br>- MPs had more favourable attitudes towards NPs when they had previous experience working with NPs                                                                                                                                                                           | Strengths: validated tool, confounding factors considered, large sample size.<br><br>Limitations: Low response rate (23.3%) and convenience sampling limits generalisability                                                           |
| <b>Mixed-Methods studies</b> |                                                                                                                                                                                    |                                                                                                |                                                                               |                                                                        |                                                                                                                                                                      |                                                                                                                                                                                                                                                                                                                                                                                                                                                                                                                                                                                                |                                                                                                                                                                                                                                        |
| [58]                         | To examine the development of collaborative relationships between family MPs and other team members                                                                                | Qualitative evaluation of RCT<br><br>Part of a mixed methods study                             | 8 family MPs, 3 NPs<br>1 pharmacist                                           | Family Practice, Ontario, Canada                                       | - Collaboration Care Provider Survey (5, 12, 18 months)<br>- focus groups<br>- in-depths interviews<br>- case study (each provider)<br>- daily logs by NP/pharmacist | Barriers: Lack of role clarity, geographic separation, MPs concerned about legal responsibility of shared care.<br>- Facilitators: Regular meetings, clarifying responsibilities, prior experience of working with NPs, phone messaging system to facilitate contact among each other.<br>- approx. 6 months needed to establish an understanding of the areas of competency, scope of practice, individual strengths<br>- Collaboration as the ideal practice was not always attained.                                                                                                        | Strengths: Validated tool for quantitative measures, data validation through mixed-methods approach<br><br>Limitations: NP/MP sampling process not described, researcher background and influence on data not stated                   |
| [19]                         | To develop, implement and evaluate an intervention to support NP/family MP structured collaborative practice, including the evaluation of satisfaction levels,                     | Mixed-methods study with quasi-experimental design<br><br>Project-related publications [59,60] | 5 NPs<br>13 MPs<br><br>Purposeful sampling                                    | 4 PHC practices, (2 control, 2 intervention sites)<br>Ontario, Canada, | - Surveys and interviews of NPs/MPs, patients and key informants<br>- patient encounter forms                                                                        | - Barriers: Medico-legal concerns by MPs, lack of knowledge about NP role, practice structural and ideological differences (health promotion), lack of financial support<br>- Facilitators: bi-directional consultation and referrals, working side-by-side at the same clinic, previous experience of working with NPs, clarification of values/ expectations about collaboration through discussion, use of technologies to facilitate collaboration across distance<br>- NP and MPs in intervention sites had higher level of collaboration and higher satisfaction with collaboration post | Strengths: Comprehensive evaluation of NP-MP collaboration<br><br>Limitations: Self-reported data on referrals from NPs/MPs, questionable to measure shared care based on referral patterns, small sample size limits generalisability |

|                                                                                                                                                                                              |                                                                                                                                       |                                                                                                                       |                                            |                                 |                                                                                                                                                                                             |                                                                                                                                                                                                                                                                                                             |                                                                                                                                                                                                                                        |
|----------------------------------------------------------------------------------------------------------------------------------------------------------------------------------------------|---------------------------------------------------------------------------------------------------------------------------------------|-----------------------------------------------------------------------------------------------------------------------|--------------------------------------------|---------------------------------|---------------------------------------------------------------------------------------------------------------------------------------------------------------------------------------------|-------------------------------------------------------------------------------------------------------------------------------------------------------------------------------------------------------------------------------------------------------------------------------------------------------------|----------------------------------------------------------------------------------------------------------------------------------------------------------------------------------------------------------------------------------------|
|                                                                                                                                                                                              | change of attitudes towards collaboration over the course of project and identification of barriers and facilitators to collaboration |                                                                                                                       |                                            |                                 |                                                                                                                                                                                             | intervention.                                                                                                                                                                                                                                                                                               |                                                                                                                                                                                                                                        |
| <b>Cross-sectional study</b>                                                                                                                                                                 |                                                                                                                                       |                                                                                                                       |                                            |                                 |                                                                                                                                                                                             |                                                                                                                                                                                                                                                                                                             |                                                                                                                                                                                                                                        |
| [59]                                                                                                                                                                                         | To determine which services are provided to patients by NPs and MPs and to determine the degree of collaboration/shared care.         | Mixed methods cross sectional study<br><br>(this paper reports quant results of a larger mixed methods study) [19,60] | 5 NPs<br>13 MPs<br><br>Purposeful sampling | 4 PHC practices Ontario, Canada | - Encounter forms filled out by NPs and MPs (400 patients encounters)<br>- Referral mechanisms used to measure shared care/collaboration (- Patient interviews, not reported in this paper) | - Comparison of task of NPs and MPs: NPs similarly involved in curative services than MPs, NPs less involved in rehabilitation, more involved in disease prevention.<br>- 16% of NP referrals were to MPs; 2% of referrals by MPs were to NPs (unidirectional referrals)<br>- Underutilisation of NP skills | Strengths: Comprehensive evaluation of NP-MP collaboration<br><br>Limitations: Self-reported data on referrals from NPs/MPs, questionable to measure shared care based on referral patterns, small sample size limits generalisability |
| PHC = Primary Health Care, NP = Nurse Practitioner, MP = Medical Practitioner, GP = General Practitioner, APN = Advanced Practice Nurses, US = United States of America, UK = United Kingdom |                                                                                                                                       |                                                                                                                       |                                            |                                 |                                                                                                                                                                                             |                                                                                                                                                                                                                                                                                                             |                                                                                                                                                                                                                                        |

#### Reference, not used in review

\* Bergeson J, Cash R, Boulger J, Bergeron D: The attitudes of rural Minnesota family physicians toward nurse practitioners and physician assistants. J Rural Health 1997, 13(3):196-205.
